# Supplementary material for: Promoted crystallisation and cationic ordering in thermoelectric Cu26V2Sn6S32 colusite by eccentric vibratory ball milling
Source: Royal Society of Chemistry journal article supplement (doi:10.1039/d0dt03368e), 2020-01-01
Supplement: d0dt03368e1.pdf [file d0dt03368e1.pdf]

## Supplementary Information

### Promoted crystallisation and cationic ordering in thermoelectric $\text{Cu}_{26}\text{V}_2\text{Sn}_6\text{S}_{32}$

#### colusite by eccentric vibratory ball milling

Michal Hegedüs,<sup>1</sup> Marcela Achimovičová,<sup>2</sup> Hongjue Hui,<sup>3</sup> Gabin Guélou,<sup>3</sup> Pierric Lemoine,<sup>4</sup> Ismail Fourati,<sup>5</sup> Jean Juraszek,<sup>5</sup> B. Malaman,<sup>6</sup> Peter Baláž,<sup>2</sup> Emmanuel Guilmeau<sup>3</sup>

<sup>1</sup> Synthon, s.r.o., Brněnská 32, 678 01 Blansko, Czech Republic

<sup>2</sup> Institute of Geotechnics, Slovak Academy of Sciences, Watsonova 45, 04001 Košice, Slovakia

<sup>3</sup> CRISMAT, CNRS, Normandie Univ, ENSICAEN, UNICAEN, 14000 Caen, France

<sup>4</sup> Univ Rennes, CNRS, ISCR - UMR 6226, F-35000 Rennes, France

<sup>5</sup> Normandie Univ, INSA Rouen, UNIROUEN, CNRS, GPM, 76000 Rouen, France

<sup>6</sup> Institut Jean Lamour, UMR 7198 CNRS – Université de Lorraine, 2 allée André Guinier-Campus ARTEM, BP 50840, 54011 Nancy Cedex, France

**Table S1.** Rietveld analysis of sample milled for 1 hour + SPS

|                                                                |                               |              |                                       |                               |              |
|----------------------------------------------------------------|-------------------------------|--------------|---------------------------------------|-------------------------------|--------------|
| Colusite<br>$\text{Cu}_{26}\text{V}_2\text{Sn}_6\text{S}_{32}$ | Weight fraction in sample (%) | 94(2)        | Digenite<br>$\text{Cu}_{2-x}\text{S}$ | Weight fraction in sample (%) | 5(1)         |
|                                                                | Space group                   | $P\bar{4}3n$ |                                       | Space group                   | $Fm\bar{3}m$ |
|                                                                | a (nm)                        | 1.0781(9)    |                                       | a (nm)                        | 0.5561(2)    |
|                                                                | R-Bragg                       | 5.51         |                                       | R-Bragg                       | 15.5         |
| Covellite<br>CuS                                               | Weight fraction in sample (%) | 1(1)         |                                       |                               |              |
|                                                                | Space group                   | $P6_3/mmc$   |                                       |                               |              |
|                                                                | a (nm)                        | 0.3794(6)    |                                       |                               |              |
|                                                                | c (nm)                        | 1.6331(4)    |                                       |                               |              |
|                                                                | R-Bragg                       | 17.3         |                                       |                               |              |

Conventional Rietveld factors (as defined in FullProf software):

|           |       |
|-----------|-------|
| $R_p$     | 17.3  |
| $R_{wp}$  | 18.2  |
| $R_{exp}$ | 12.97 |
| $\chi^2$  | 1.97  |

**Table S2.** Rietveld analysis of sample milled for 3 hours + SPS

|                                                                |                               |              |                                       |                               |              |
|----------------------------------------------------------------|-------------------------------|--------------|---------------------------------------|-------------------------------|--------------|
| Colusite<br>$\text{Cu}_{26}\text{V}_2\text{Sn}_6\text{S}_{32}$ | Weight fraction in sample (%) | 95(2)        | Digenite<br>$\text{Cu}_{2-x}\text{S}$ | Weight fraction in sample (%) | 3(1)         |
|                                                                | Space group                   | $P\bar{4}3n$ |                                       | Space group                   | $Fm\bar{3}m$ |
|                                                                | a (nm)                        | 1.0779(0)    |                                       | a (nm)                        | 0.5556(0)    |
|                                                                | R-Bragg                       | 6.57         |                                       | R-Bragg                       | 27.3         |
| Covellite<br>CuS                                               | Weight fraction in sample (%) | 2(1)         |                                       |                               |              |
|                                                                | Space group                   | $P6_3/mmc$   |                                       |                               |              |
|                                                                | a (nm)                        | 0.3793(2)    |                                       |                               |              |
|                                                                | c (nm)                        | 1.6355(2)    |                                       |                               |              |
|                                                                | R-Bragg                       | 26.1         |                                       |                               |              |

Conventional Rietveld factors (as defined in FullProf software):

|           |       |
|-----------|-------|
| $R_p$     | 17.9  |
| $R_{wp}$  | 20.7  |
| $R_{exp}$ | 14.03 |
| $\chi^2$  | 2.18  |

**Table S3.** Rietveld analysis of sample milled for 6 hours + SPS

|                                                                |                               |              |
|----------------------------------------------------------------|-------------------------------|--------------|
| Colusite<br>$\text{Cu}_{26}\text{V}_2\text{Sn}_6\text{S}_{32}$ | Weight fraction in sample (%) | 99(1)*       |
|                                                                | Space group                   | $P\bar{4}3n$ |
|                                                                | a (nm)                        | 1.0763(9)    |
|                                                                | R-Bragg                       | 3.70         |

\* contamination by  $\text{SiO}_2$

Conventional Rietveld factors (as defined in FullProf software):

|           |       |
|-----------|-------|
| $R_p$     | 15.7  |
| $R_{wp}$  | 16.0  |
| $R_{exp}$ | 12.36 |
| $\chi^2$  | 1.67  |

**Table S4.** Rietveld analysis of sample milled for 12 hours + SPS

|                                                                |                               |           |
|----------------------------------------------------------------|-------------------------------|-----------|
| Colusite<br>$\text{Cu}_{26}\text{V}_2\text{Sn}_6\text{S}_{32}$ | Weight fraction in sample (%) | 99(1)*    |
|                                                                | Space group                   | $P43n$    |
|                                                                | a (nm)                        | 1.0761    |
|                                                                | $x_{\text{Cu}2}$              | 0.2544(2) |
|                                                                | x, y, $z_{\text{Cu}3}$        | 0.2546(3) |
|                                                                | x, y, $z_{\text{S}1}$         | 0.1252(7) |
|                                                                | $x_{\text{S}2}$               | 0.3790(3) |
|                                                                | $y_{\text{S}2}$               | 0.3681(3) |
|                                                                | $z_{\text{S}2}$               | 0.1251(6) |
| R-Bragg                                                        | 2.59                          |           |

\* contamination by WC

Conventional Rietveld factors (as defined in FullProf software):

|           |       |
|-----------|-------|
| $R_p$     | 15.5  |
| $R_{wp}$  | 15.1  |
| $R_{exp}$ | 11.63 |
| $\chi^2$  | 1.68  |

**Table S5.** Cationic elemental analysis from EDS analysis on the colusite matrix normalised for 26 Cu

|           | Cu | V     | Sn   |
|-----------|----|-------|------|
| 1h + SPS  | 26 | 1.30  | 7.74 |
| 3h + SPS  | 26 | 1.549 | 7.15 |
| 6h + SPS  | 26 | 1.68  | 6.74 |
| 12h + SPS | 26 | 2.06  | 6.23 |

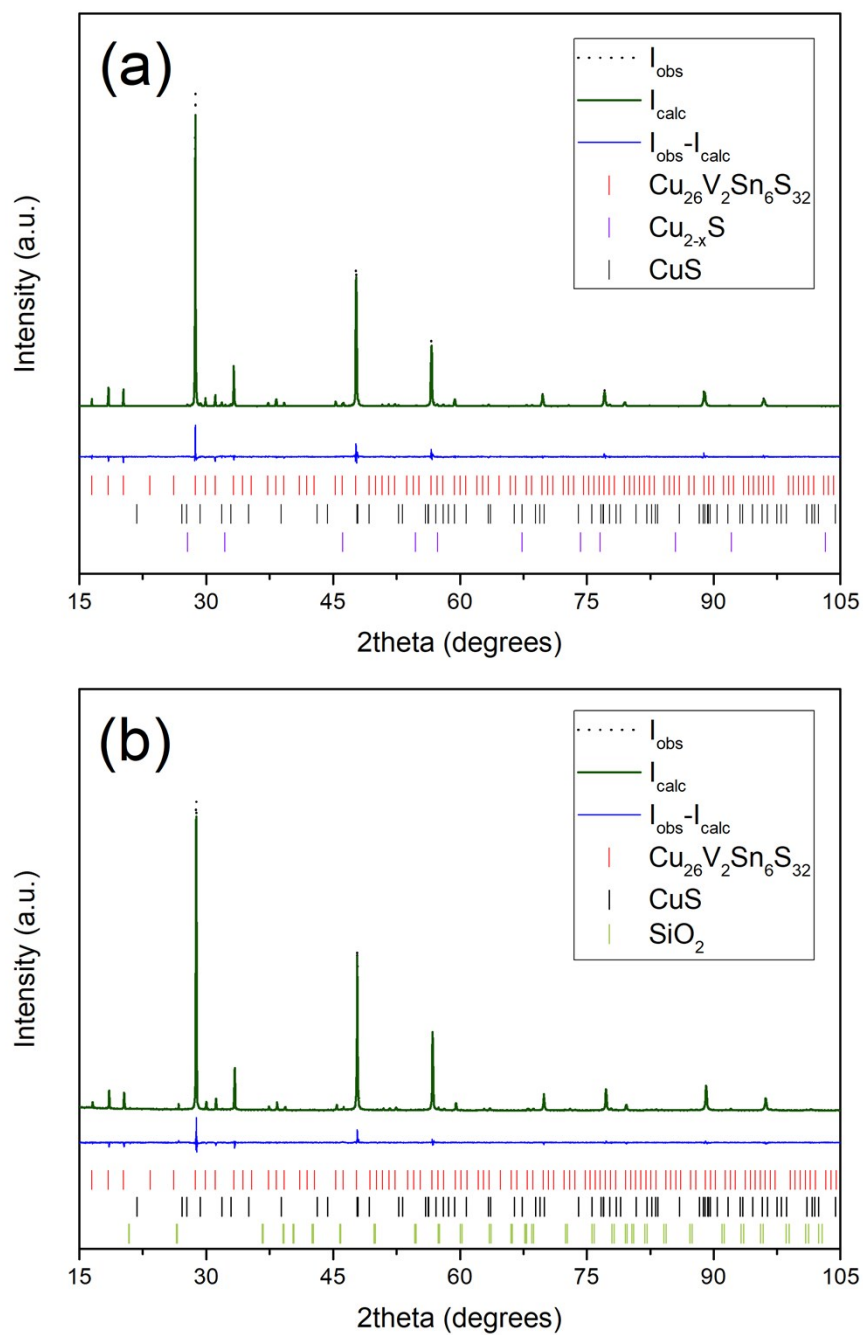

**Figure S1.** Rietveld refinements of the XRPD patterns of (a) 3h+SPS and (b) 6h+SPS samples.

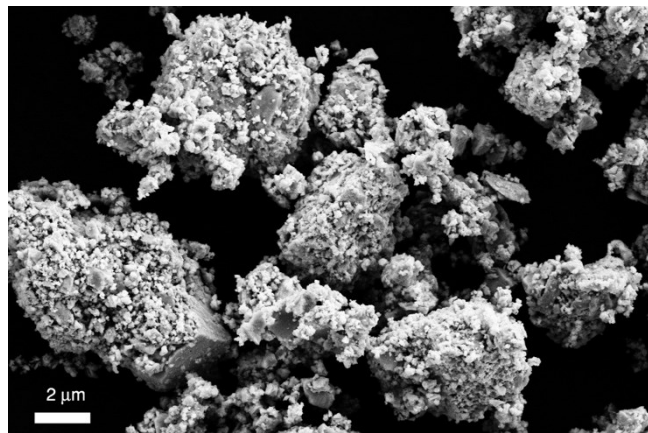

**Figure S2.** Typical micrography of as- milled powders (3h).

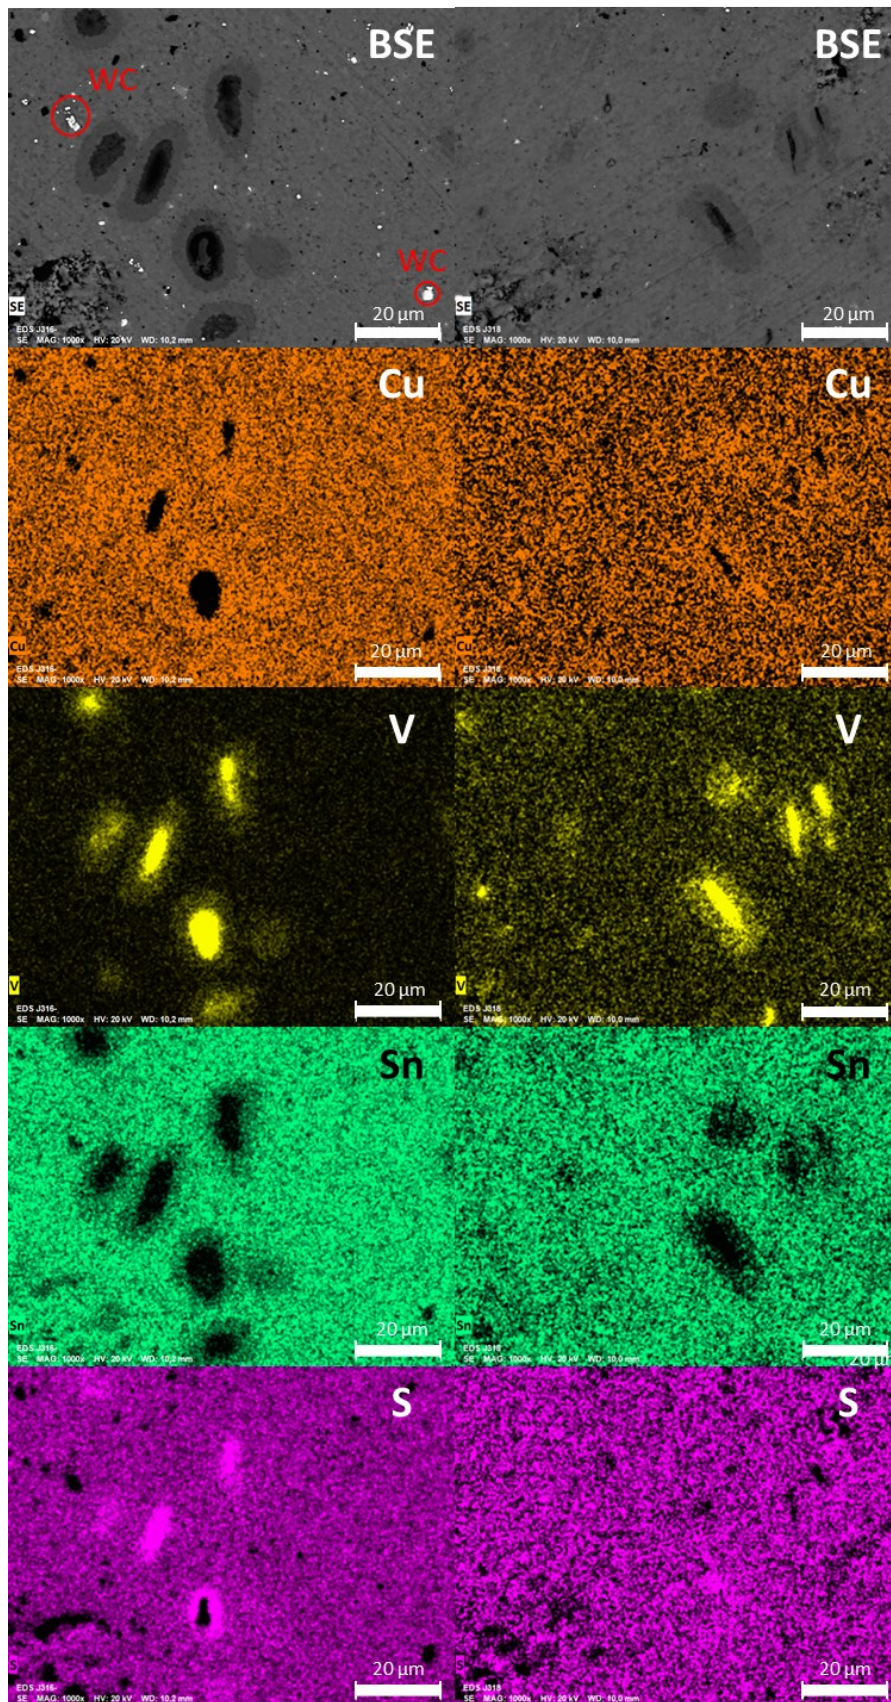

**Figure S3.** BSE micrographs and corresponding EDS elemental analysis maps for the samples 1h+SPS (left column) and 3h+SPS (right column)



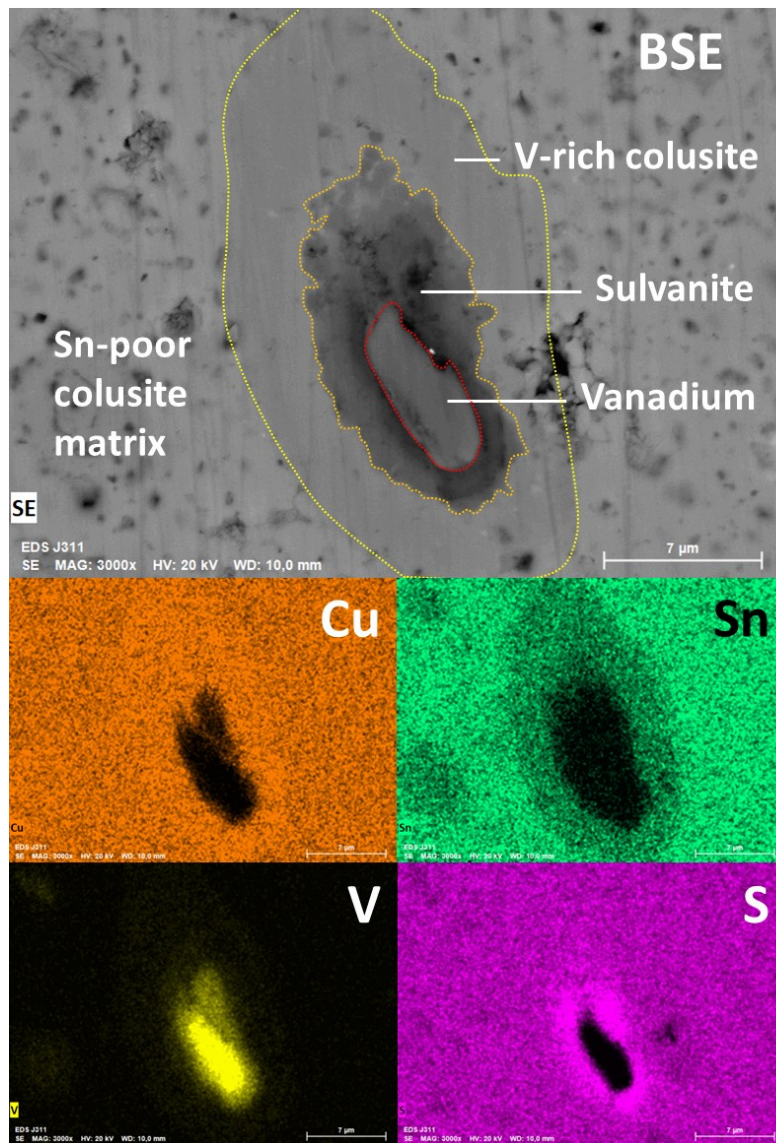

**Figure S4.** Backscattered SEM image of polished surface showing V-rich core-shell structures in 6h+SPS sample



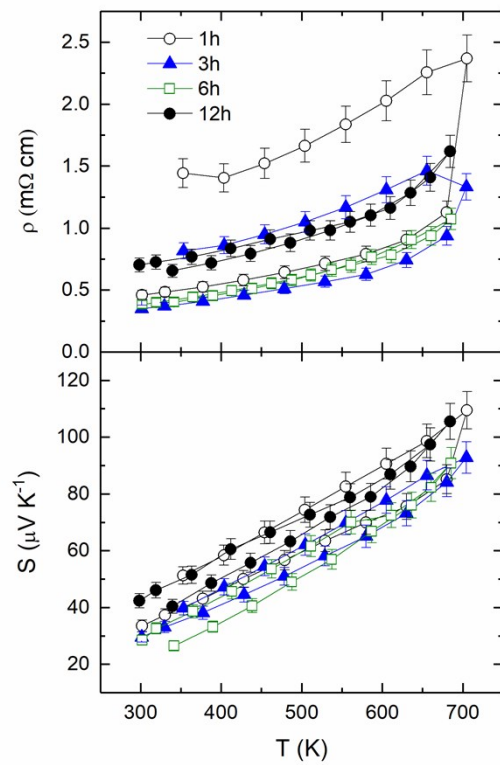

**Figure S5.** Heating and cooling measurements of the electrical resistivity and Seebeck coefficient with different ball-milling times
